# Supplementary material
Source: publisher site journal article supplement (https://www.dovepress.com/article/533393)
Supplement: Supplementary file 1 [file Supplementary%20figure%201.docx]

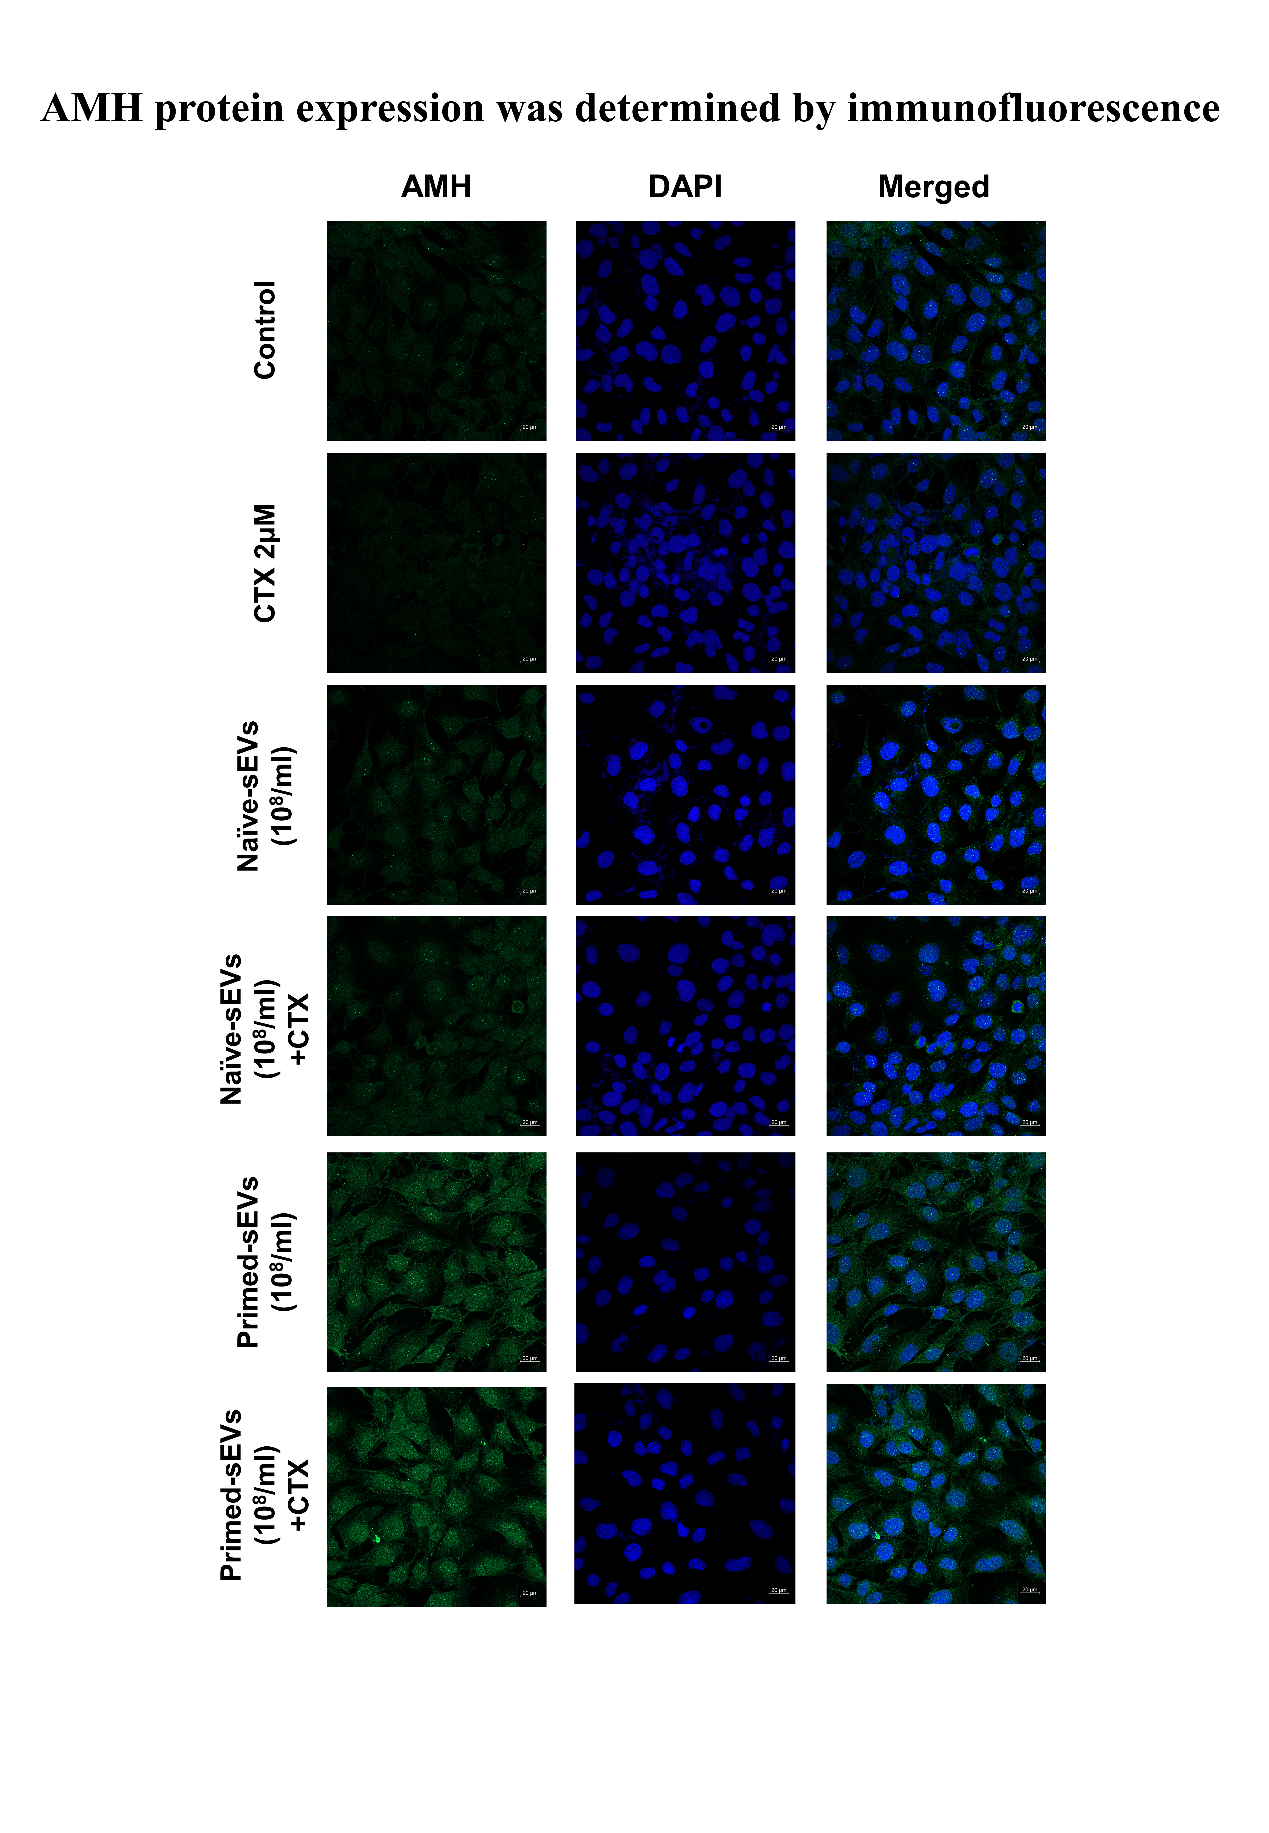
**Supplementary Figure 1**. Immunofluorescence analysis of AMH expression in hGCs treated with CTX and AMSC-sEVs. Representative confocal microscopy images of anti-Müllerian hormone (AMH) protein expression corresponding to Figure 6A. Human granulosa cells (hGCs) were treated with or without 2 μM cyclophosphamide (CTX) for 48 h, followed by treatment with naïve or Primed AMSC-sEVs for an additional 48 h. AMH expression was visualized by immunofluorescence staining and laser scanning confocal microscopy. Quantification of fluorescence intensity is shown in Figure 6A.
